# Supplementary material for: Super-delta: a new differential gene expression analysis procedure with robust data normalization
Source: PubMed Central journal article supplement (PMC5740711; doi:10.1186/s12859-017-1992-2), 2017-12-21
Supplement: 12859_2017_1992_MOESM1_ESM.pdf [file 12859_2017_1992_MOESM1_ESM.pdf]

# 1 Justification of the super-delta method

## 1.1 The Model and the Proposed Methods

In this section, we will provide theoretical justifications to the super-delta method based on a mixed effects model for gene expression [1, 2, 3, 4, 5]. Specifically, we consider that within each phenotypic group ( $a = A, B$ ), the (log)-expression level of the  $i$ th gene sampled from  $j = 1, 2, \dots, N_a$  arrays are realizations of the following model

$$y_{ij}^a = \alpha_j + x_{ij}^a, \quad x_{ij}^a := \mu_i^a + \epsilon_{ij}^a, \quad \alpha_j \sim N(0, \eta^2), \quad \epsilon_{ij}^a \sim N(0, \sigma_i^2). \quad (1)$$

Here  $\alpha_j$  is a **slide-specific** factor,  $\mu_i^a$  is the mean for each phenotype.  $x_{ij}^a$  can be viewed as the **oracle** expression level, which has biological variation and possibly some other independent variation but no **slide-specific** noise. We are interested in testing the following hypotheses for each  $i = 1, 2, \dots, m$ :

$$H_0^{(i)} : \mu_i^A = \mu_i^B, \quad H_1^{(i)} : \mu_i^A \neq \mu_i^B. \quad (2)$$

Ideally, we would like to remove  $\alpha_j$  from Model (1) by a normalization method, and then test hypotheses (2) based on two-sample  $t$ -statistics constructed from  $x_{ij}^a$ , the “**noise-free**” expressions:

$$t_i^* := \frac{\bar{x}_i^A - \bar{x}_i^B}{\hat{\sigma}_i^p \sqrt{\frac{1}{N_A} + \frac{1}{N_B}}}, \quad \hat{\sigma}_i^p := \sqrt{\frac{\sum_{j=1}^{N_A} (x_{ij}^A - \bar{x}_i^A)^2 + \sum_{j'=1}^{N_B} (x_{ij'}^B - \bar{x}_i^B)^2}{N - 2}}. \quad (3)$$

Here  $N = N_A + N_B$  is the total sample size. We will call these  $t_i^*$  as the **oracle**  $t$ -statistics henceforth. In practice, even the most effective normalization cannot perfectly recover  $x_{ij}^a$  from  $y_{ij}^a$ . Our previous studies show that commonly used normalization methods can effectively reduce sample variance explained in part by  $\alpha_j$ , at a price of introducing certain bias to the normalized expressions, which in turn reduces statistical power and increases type I error rate [6, 5].

In this study, we take a completely different approach. We will first compute pairwise differences called “**deltas**”, defined as follows:

$$\delta_{ik,j}^a := y_{ij}^a - y_{kj}^a = x_{ij}^a - x_{kj}^a = \mu_i^a - \mu_k^a + \epsilon_{ij}^a - \epsilon_{kj}^a \sim N(\mu_i^a - \mu_k^a, \sigma_i^2 + \sigma_k^2). \quad (4)$$

Next, we compute two-sample  $t$ -statistics based on these deltas for all  $i = 1, 2, \dots, m$ ;  $k = 1, 2, \dots, m$ ; and  $i \neq k$

$$t_{ik} := \frac{\bar{\delta}_{ik}^A - \bar{\delta}_{ik}^B}{s_{ik}^p \sqrt{\frac{1}{N_A} + \frac{1}{N_B}}}, \quad s_{ik}^p := \sqrt{\frac{\sum_{j=1}^{N_A} (\delta_{ik,j}^A - \bar{\delta}_{ik}^A)^2 + \sum_{j'=1}^{N_B} (\delta_{ik,j'}^B - \bar{\delta}_{ik}^B)^2}{N - 2}}. \quad (5)$$

Let us denote the vector  $(t_{i1}, t_{i2}, \dots, t_{i,i-1}, t_{i,i+1}, \dots, t_{im})^T$ , by  $\vec{t}_i$ . Once we obtain  $\vec{t}_i$ , we can estimate the oracle statistic,  $t_i^*$ , by one of the following three approaches:

1. Sample mean.  $\hat{t}_i^{(\text{mean})} := \frac{\sqrt{2}}{m-1} \sum_{k \neq i} t_{ik}$ . The use of the multiplicative coefficient  $\sqrt{2}$  will be justified later.
2. Sample median.  $\hat{t}_i^{(\text{med})} := \sqrt{2} \times \text{Med}(\vec{t}_i)$ . Again, the coefficient  $\sqrt{2}$  will be justified later.
3. A robust estimator median fold trimmed median (MFTM),  $\hat{t}_i^{(\text{robust})}$ , defined as follows.

- (a) Filter out a proportion (say  $c = 20\%$ ) of the most *extreme* test statistics from  $\vec{t}_i$ . Here the most extreme values are determined by  $|t_{ij}|$ , the *absolute values* of  $t_{ij}$ . This step ensures that most, if not all,  $\delta_{ij}$ 's normalized with DEGs will be excluded. Again we need to reiterate that filtering out 20% of  $t_{ij}$  according to  $|t_{ij}|$  is not equivalent to filtering out 10% of smallest  $t_{ij}$  and 10% of largest  $t_{ij}$ . If up/down regulations are **unbalanced**, filtering according to  $|t_{ij}|$  will automatically take care of it yet filtering based on removing the smallest and largest 10%  $t_{ij}$ 's will result in some bias.
- (b) Now estimate the center from the rest  $1 - c$  of the  $\delta_{ij}$ 's. We use the median for this purpose.
- (c) In the end, we still need to multiply the trimmed median by  $\sqrt{2}$ .

## 1.2 The conditional interpretation of the estimation procedure

Because  $t_{ik}$  are computed from the difference of the  $i$ th gene expression and all the rest genes, they are *correlated* by construction. Besides,  $t_i^*$ , the oracle statistic, is not a population characteristic so the very "estimation" needs to be interpreted in an unconventional way. In this section, we will provide a rigorous interpretation based on conditional inference.

**Proposition 1.1.** *When conditioned on  $\epsilon_{ij}^a$ ,  $\delta_{ik,j}^a$  and  $\delta_{ik',j}^a$  are independent, for all  $k \neq k'$  and  $k, k' \neq i$ .*

*Proof.* The proof is trivial because  $\epsilon_{ij}^a$  is the source of randomness of the  $i$ th gene. Once it is fixed by conditioning, the only source of randomness in  $\delta_{ik,j}^a$  is from  $\epsilon_{kj}^a$ , which are independent of each other for different  $j$ 's.  $\square$

**Corollary 1.2.** *When conditioned on  $\epsilon_{ij}^a$ , any  $t_{ik}$  and  $t_{ik'}$  in  $\vec{t}_i$  ( $k \neq k'$ ) are independent.*

Apparently, the above corollary is true because  $t_{ik}$  depends only on the values of  $\delta_{ik,j}^a$  and  $t_{ik'}$  depends on  $\delta_{ik',j}^a$ ; and we already know that  $\delta_{ik,j}^a$  and  $\delta_{ik',j}^a$  are conditionally independent. The relationship can be seen more clearly from the following flow chart:

$$\begin{aligned} t_{ik} &\leftarrow \delta_{ik,j}^a \leftarrow \epsilon_{kj}^a, \text{ (given } \epsilon_{ij}^a) \\ t_{ik'} &\leftarrow \delta_{ik',j}^a \leftarrow \epsilon_{k'j}^a, \text{ (given } \epsilon_{ij}^a) \end{aligned} \quad (6)$$

Let us denote by  $\mathcal{S}^0$  the set of all NDEGs (null genes) and  $\mathcal{S}^1$  the set of all DEGs. Obviously,  $d_k := \mu_k^A - \mu_k^B = 0$  for  $k \in \mathcal{S}^0$  and  $d_k \neq 0$  for  $k \in \mathcal{S}^1$ . Simple calculations lead to the following conclusions.

**Proposition 1.3.** *When conditioned on  $\epsilon_{ij}^a$ , the sample mean difference of deltas,  $\bar{\delta}_{ik}^A - \bar{\delta}_{ik}^B$ , follows a normal distribution*

$$\bar{\delta}_{ik}^A - \bar{\delta}_{ik}^B \sim N \left( \underbrace{\mu_i^A - \mu_i^B}_{d_i} - \underbrace{(\mu_k^A - \mu_k^B)}_{d_k} + \underbrace{(\bar{\epsilon}_i^A - \bar{\epsilon}_i^B)}_{\text{cond. mean diff.}}, \sigma_k^2 \left( \frac{1}{N_A} + \frac{1}{N_B} \right) \right). \quad (7)$$

*Proof.* We can write  $\bar{\delta}_{ik}^A$  in terms of  $\bar{\epsilon}_i^A$  and  $\bar{\epsilon}_k^A$ :

$$\begin{aligned}
\bar{\delta}_{ik}^A &= \frac{1}{N_A} \sum_{j=1}^{N_A} \delta_{ik,j}^A \\
&= \frac{1}{N_A} \sum_{j=1}^{N_A} (y_{ij}^A - y_{kj}^A) \\
&= \frac{1}{N_A} \sum_{j=1}^{N_A} (x_{ij}^A - x_{kj}^A) \\
&= \frac{1}{N_A} \sum_{j=1}^{N_A} [(\mu_i^A + \epsilon_{ij}^A) - (\mu_k^A + \epsilon_{kj}^A)] \\
&= \mu_i^A - \mu_k^A + \bar{\epsilon}_i^A - \bar{\epsilon}_k^A.
\end{aligned}$$

Similarly,

$$\bar{\delta}_{ik}^B = \mu_i^B - \mu_k^B + \bar{\epsilon}_i^B - \bar{\epsilon}_k^B.$$

Therefore, we have the following (conditional) distributions:

$$\begin{aligned}
\bar{\delta}_{ik}^A \Big| \epsilon_{ij}^A &\sim N \left( \mu_i^A - \mu_k^A, \frac{1}{N_A} \sigma_k^2 \right) \\
\bar{\delta}_{ik}^B \Big| \epsilon_{ij}^B &\sim N \left( \mu_i^B - \mu_k^B, \frac{1}{N_B} \sigma_k^2 \right) \\
\bar{\delta}_{ik}^A - \bar{\delta}_{ik}^B \Big| \epsilon_{i.} &\sim N \left( d_i - d_k + (\bar{\epsilon}_i^A - \bar{\epsilon}_i^B), \left( \frac{1}{N_A} + \frac{1}{N_B} \right) \sigma_k^2 \right) \\
E \left( \bar{\delta}_{ik}^A - \bar{\delta}_{ik}^B \Big| \epsilon_{i.} \right) &= d_i - d_k + (\bar{\epsilon}_i^A - \bar{\epsilon}_i^B) \\
&= \bar{x}_i^A - \bar{x}_i^B - d_k, \\
\text{Var} \left( \bar{\delta}_{ik}^A - \bar{\delta}_{ik}^B \Big| \epsilon_{i.} \right) &= \sigma_k^2 \left( \frac{1}{N_A} + \frac{1}{N_B} \right).
\end{aligned}$$

□

**Proposition 1.4.** *Sample variance of deltas computed in each phenotypic group, denoted by  $(s_{ik}^a)^2$ ,  $a = A, B$ , has the following non-central  $\chi^2$  distribution conditional on  $\epsilon_{i.}^a$ .*

$$\frac{(N_a - 1)(s_{ik}^a)^2}{\sigma_k^2} \sim \chi_{N_a - 1; \lambda_{ik}^a}^2, \quad \lambda_{ik}^a = \frac{(N_a - 1)(\hat{\sigma}_{\epsilon_{i.}}^a)^2}{\sigma_k^2}. \quad (8)$$

Here  $(\hat{\sigma}_{\epsilon_{i.}}^a)^2 := \frac{1}{N_a - 1} \sum_{j=1}^{N_a} (\epsilon_{ij}^a - \bar{\epsilon}_i^a)^2$  is the sample variance of  $\epsilon_{i.}^a$ .

*Proof.* By definition,

$$\begin{aligned}
(s_{ik}^a)^2 &:= \frac{\sum_{j=1}^{N_a} (\delta_{ik,j}^a - \bar{\delta}_{ik}^a)^2}{N_a - 1} \\
&= \frac{\sum_{j=1}^{N_a} (\epsilon_{ij}^a - \bar{\epsilon}_i^a - (\epsilon_{kj}^a - \bar{\epsilon}_k^a))^2}{N_a - 1} \\
&= \frac{1}{N_a - 1} (\epsilon_{i.}^a - \epsilon_{k.}^a)^T \left( I - \frac{1}{N_a} J \right) (\epsilon_{i.}^a - \epsilon_{k.}^a).
\end{aligned}$$

Here  $J$  denotes an  $N_a \times N_a$ -dimensional matrix with all entries being 1. Simple calculation shows that  $(I - \frac{1}{n}J)$  is symmetric, idempotent, with rank  $N_a - 1$ . In fact, it is the projection matrix onto  $\text{span}(\mathbf{1})^\perp$ , where  $\mathbf{1}$  is a vector of all 1s. When conditioned on  $\epsilon_{ij}^a$ ,  $\epsilon_{ij}^a - \epsilon_{kj}^a$  is a normal distribution with mean  $\epsilon_{ij}^a$  and variance  $\sigma_k^2$ . Therefore

$$\frac{(N_a - 1)(s_{ik}^a)^2}{\sigma_k^2} \sim \chi_{N_a - 1; \lambda_{ik}^a}^2, \quad \lambda_{ik}^a = (\epsilon_{i\cdot}^a)^T \left( I - \frac{1}{N_a} J \right) \epsilon_{i\cdot}^a = \frac{(N_a - 1)(\hat{\sigma}_{\epsilon_i^a}^2)^2}{\sigma_k^2}.$$

□

**Corollary 1.5.** *The pooled sample variance,  $(s_{ik}^p)^2 := \frac{(N_A - 1)(s_{ik}^A)^2 + (N_B - 1)(s_{ik}^B)^2}{N - 2}$ , has the following conditional non-central  $\chi^2$  distribution representation*

$$\frac{N - 2}{\sigma_k^2} \cdot (s_{ik}^p)^2 \sim \chi_{N - 2; \lambda_{ik}}^2, \quad \lambda_{ik} = \frac{(N - 2)(\hat{\sigma}_{\epsilon_i^p}^2)^2}{\sigma_k^2}. \quad (9)$$

Here  $N = N_A + N_B$  is the total sample size and  $(\hat{\sigma}_{\epsilon_i^p}^2)^2$  is the pooled sample variance of  $\epsilon_i$  computed from both phenotypic groups.

*Proof.* This corollary is a direct consequence of Proposition 1.4 and the additivity of noncentral  $\chi^2$ -distribution. □

**Proposition 1.6.** *The sample mean and sample variance of deltas are independent conditional on  $\epsilon_i$  in each phenotypic group. Hence, the sample mean difference and pooled sample variance of deltas are independent.*

*Proof.* This is just because  $\epsilon_{kj}^a - \bar{\epsilon}_k^a$  is independent of  $\bar{\epsilon}_k^a$ , for all  $j$ . □

Based on Proposition 1.3, Corollary 1.5, and Proposition 1.6, we have the following conclusion.

**Lemma 1.7.**  *$t_{ik}$  computed from deltas follows a doubly non-central  $t$ -distribution as follows*

$$t_{ik} \sim t''(N - 2, \mu_{ik}, \lambda_{ik}), \quad \mu_{ik} := \frac{\bar{x}_i^A - \bar{x}_i^B - d_k}{\sigma_k \sqrt{\frac{1}{N_A} + \frac{1}{N_B}}}, \quad \lambda_{ik} := \frac{(N - 2)(\hat{\sigma}_{\epsilon_i^p}^2)^2}{\sigma_k^2}. \quad (10)$$

*Proof.*

$$t_{ik} = \sqrt{N - 2} \cdot \frac{\frac{\bar{\delta}_{ik}^A - \bar{\delta}_{ik}^B}{\sigma_k \sqrt{\frac{1}{N_A} + \frac{1}{N_B}}}}{\frac{\sqrt{N - 2}}{\sigma_k} \cdot s_{ik}^p} \sim \sqrt{N - 2} \cdot \frac{N(\mu_{ik}, 1)}{\chi_{N - 2; \lambda_{ik}}^2}.$$

□

**Lemma 1.8.** *The conditional mean value of  $t_{ik}$  given  $\epsilon_i$ , which is a doubly noncentral  $t$ -distribution, has the following large-sample approximation*

$$\begin{aligned} E(t_{ik} | \epsilon_i) &= \mu_{ik} \sqrt{\frac{N - 2}{2}} \cdot \frac{\Gamma(\frac{N - 3}{2})}{\Gamma(\frac{N - 2}{2})} \cdot H\left(\frac{1}{2}, \frac{N - 2}{2}; -\frac{\lambda_{ik}}{2}\right) \\ &= \frac{\mu_{ik}}{\sqrt{1 + \frac{(\hat{\sigma}_{\epsilon_i^p}^2)^2}{\sigma_k^2}}} + O(N^{-1}) \\ &= \frac{\bar{x}_i^A - \bar{x}_i^B - d_k}{\sqrt{\sigma_k^2 + \hat{\sigma}_{\epsilon_i^p}^2} \cdot \sqrt{\frac{1}{N_A} + \frac{1}{N_B}}} + O(N^{-1}). \end{aligned} \quad (11)$$

In particular, for  $k \in \mathcal{S}^0$ ,

$$E(t_{ik}|\epsilon_i) = \sqrt{\frac{1}{1 + \frac{(\hat{\sigma}_{\epsilon,i}^p)^2}{\sigma_k^2}}} \cdot t_i^* + O(N^{-1}). \quad (12)$$

for  $k \in \mathcal{S}^1$ ,

$$\begin{aligned} E(t_{ik}|\epsilon_i) &= \sqrt{\frac{1}{1 + \frac{(\hat{\sigma}_{\epsilon,i}^p)^2}{\sigma_k^2}}} \cdot t_i^* + \frac{d_k}{\sqrt{\sigma_k^2 + \hat{\sigma}_{\epsilon,i}^2} \cdot \sqrt{\frac{1}{N_A} + \frac{1}{N_B}}} + O(N^{-1}) \\ &= \sqrt{\frac{1}{1 + \frac{(\hat{\sigma}_{\epsilon,i}^p)^2}{\sigma_k^2}}} \cdot t_i^* + d_k \cdot O(N) + O(N^{-1}) = O(N). \end{aligned} \quad (13)$$

*Proof.* For simplicity, let us skip “ $|\epsilon_i$ .” in the following derivation. Namely, all expectations/variance in the following proof are conditioned on  $\epsilon_i$ .

Let us denote  $\frac{\bar{\delta}_{ik}^A - \bar{\delta}_{ik}^B}{\sigma_k \sqrt{\frac{1}{N_A} + \frac{1}{N_B}}}$  by  $U$  and  $\frac{\sigma_k}{s_{ik}^p}$  by  $W$ , so  $t_{ik} := U \cdot W$ . By construction, we know that  $U \sim N(\mu_{ik}, 1)$ ,  $(N-2)W^{-2} = (N-2) \cdot \frac{(s_{ik}^p)^2}{\sigma_k^2} \sim \chi_{N-2}^2; \lambda_{ik}$ , and  $U, W$  are independent.

First, we will calculate some useful moments of  $W$  based on the large sample approximation.

Since  $(s_{ik}^p)^2$  follows a conditional scaled non-central  $\chi^2$ -distribution, there exists a sequence of *i.i.d.* normal random variables  $u_1, u_2, \dots, u_{N-2}$  such that

$$\begin{aligned} W^{-2} &:= \frac{(s_{ik}^p)^2}{\sigma_k^2} \stackrel{d}{=} \frac{\sum_{l=1}^{N-2} u_l^2}{N-2} = \bar{u}^2, \quad u_l \sim N\left(\frac{\hat{\sigma}_{\epsilon,i}^p}{\sigma_k}, 1\right), \quad u_l^2 \sim \chi_{1; \frac{(\hat{\sigma}_{\epsilon,i}^p)^2}{\sigma_k^2}}^2 \\ Eu_l^2 &= \frac{(\hat{\sigma}_{\epsilon,i}^p)^2}{\sigma_k^2} + 1, \quad \text{var}(u_l^2) = 2 + 4 \cdot \frac{(\hat{\sigma}_{\epsilon,i}^p)^2}{\sigma_k^2}, \quad \text{SK}(u_l^2) = \frac{\sqrt{8}(1 + 3 \cdot \frac{(\hat{\sigma}_{\epsilon,i}^p)^2}{\sigma_k^2})}{(1 + 2 \cdot \frac{(\hat{\sigma}_{\epsilon,i}^p)^2}{\sigma_k^2})^{3/2}}. \end{aligned}$$

Based on Taylor expansion, we have

$$\begin{aligned} EW &:= E(\bar{u}^2)^{-1/2} = (Eu_l^2)^{-1/2} + \frac{3}{8} \cdot (Eu_l^2)^{-5/2} \cdot \frac{\text{var}(u_l^2)}{N} + O(N^{-2}) \\ &= \frac{1}{\sqrt{1 + \frac{(\hat{\sigma}_{\epsilon,i}^p)^2}{\sigma_k^2}}} + \frac{3 \left(1 + 2 \frac{(\hat{\sigma}_{\epsilon,i}^p)^2}{\sigma_k^2}\right)}{4 \left(1 + \frac{(\hat{\sigma}_{\epsilon,i}^p)^2}{\sigma_k^2}\right)^{5/2}} \cdot N^{-1} + O(N^{-2}), \\ &= \frac{1}{\sqrt{1 + \frac{(\hat{\sigma}_{\epsilon,i}^p)^2}{\sigma_k^2}}} + O(N^{-1}). \end{aligned} \quad (14)$$

$$\begin{aligned}
EW^2 &:= E\left(\overline{u^2}\right)^{-1} = (Eu_l^2)^{-1} - \frac{1}{2} \cdot (Eu_l^2)^{-2} \cdot \frac{\text{var}(u_l^2)}{N} + O(N^{-2}) \\
&= \frac{1}{1 + \frac{(\hat{\sigma}_{\epsilon,i}^p)^2}{\sigma_k^2}} + O(N^{-1}).
\end{aligned} \tag{15}$$

$$EW^3 := E\left(\overline{u^2}\right)^{-3/2} = \left(1 + \frac{(\hat{\sigma}_{\epsilon,i}^p)^2}{\sigma_k^2}\right)^{-3/2} + O(N^{-1}). \tag{16}$$

Therefore, based on the independence of the denominator and numerator,

$$\begin{aligned}
E(t_{ik}|\epsilon_i) &= E\left(\frac{\bar{\delta}_{ik}^A - \bar{\delta}_{ik}^B}{\sigma_k \sqrt{\frac{1}{N_A} + \frac{1}{N_B}}}\right) \cdot E\left(\overline{u^2}\right)^{-1/2} \\
&= \frac{\mu_{ik}}{\sqrt{1 + \frac{(\hat{\sigma}_{\epsilon,i}^p)^2}{\sigma_k^2}}} + O(N^{-1}) \\
&= \frac{\bar{x}_i^A - \bar{x}_i^B - d_k}{\sqrt{\sigma_k^2 + \hat{\sigma}_{\epsilon,i}^2} \cdot \sqrt{\frac{1}{N_A} + \frac{1}{N_B}}} + O(N^{-1}).
\end{aligned}$$

As a special case, for  $k \in \mathcal{S}^0$ ,  $d_k = 0$ , therefore

$$E(t_{ik}|\epsilon_i) = \sqrt{\frac{1}{1 + \frac{(\hat{\sigma}_{\epsilon,i}^p)^2}{\sigma_k^2}}} \cdot t_i^* + O(N^{-1}).$$

Similarly, we conclude that for  $k \in \mathcal{S}^1$ ,  $E(t_{ik}|\epsilon_i)$  is dominated by the  $\frac{d_k}{\sqrt{\sigma_k^2 + \hat{\sigma}_{\epsilon,i}^2} \cdot \sqrt{\frac{1}{N_A} + \frac{1}{N_B}}}$  term, which approaches  $\infty$  with rate  $O(N)$ .  $\square$

Below we will prove a similar lemma for the median. But first, we will need to understand the asymptotic properties of the higher order moments of  $t_{ik}$ .

**Proposition 1.9.** *The conditional variance and skewness of  $t_{ik}$  have the following asymptotic representation*

$$\text{var}(t_{ik}|\epsilon_i) = 1 + \frac{(\hat{\sigma}_{\epsilon,i}^p)^2}{\sigma_k^2} + O(N^{-1}), \tag{17}$$

and

$$\text{SK}(t_{ik}|\epsilon_i) = O(N^{-1}). \tag{18}$$

*Proof.* Let us use the same decomposition as in the previous proof, namely  $t_{ik} := U \cdot W$ .

For variance, we have

$$\begin{aligned}
\text{Var}(UW) &= E[(UW) - E(UW)]^2 \\
&= E(U^2W^2) - E^2(UW) \\
&= E(U^2) \cdot E(W^2) - (EU)^2 \cdot (EW)^2 \\
&= \left(\text{Var}(U) + (EU)^2\right) \cdot \left(\text{Var}(W) + (EW)^2\right) - (EU)^2 \cdot (EW)^2 \\
&= \left(\text{Var}(U) + (EU)^2\right) \text{Var}(W) + \text{Var}(U) (EW)^2 + (EU)^2 \cdot (EW)^2 - (EU)^2 \cdot (EW)^2 \\
&= \left(\text{Var}(U) + (EU)^2\right) \text{Var}(W) + \text{Var}(U) (EW)^2 \\
&= \frac{(1 + \mu_{ik}^2)\sigma_W^2}{N} + 1 + \frac{(\hat{\sigma}_{\epsilon,i}^p)^2}{\sigma_k^2} + O(N^{-1}) \\
&= 1 + \frac{(\hat{\sigma}_{\epsilon,i}^p)^2}{\sigma_k^2} + O(N^{-1}).
\end{aligned}$$

For skewness, we have the following computation. Denote  $\frac{1}{\sqrt{1 + \frac{(\hat{\sigma}_{\epsilon,i}^p)^2}{\sigma_k^2}}}$  by  $\nu_{ik}$ ,

$$\begin{aligned}
E(UW - E(UW))^3 &= E[(UW)^3 - 3(UW)^2 \cdot E(UW) + 3(UW) \cdot E^2(UW) - E^3(UW)] \\
&= (EU^3)(EW^3) - 3(EU^2)(EW^2)(EU)(EW) + 3(EU)^3(EW)^3 - (EU)^3(EW)^3 \\
&= (EU^3)(EW^3) - 3(EU^2)(EW^2)(EU)(EW) + 2(EU)^3(EW)^3 \\
&= (\mu_{ik}^3 + 3\mu_{ik})(\nu_{ik}^3 + O(N^{-1})) \\
&\quad - 3(1 + \mu_{ik}^2)(\nu_{ik}^2 + O(N^{-1})) \cdot \mu_{ik} \cdot (\nu_{ik} + O(N^{-1})) \\
&\quad + 2\mu_{ik}^3(\nu_{ik} + O(N^{-1}))^3 \\
&= O(N^{-1}).
\end{aligned}$$

So the skewness is

$$\text{SK}(UW) := \frac{E(UW - E(UW))^3}{\text{Var}(UW)^{3/2}} = O(N^{-1}).$$

□

Next, we prove that both the median and mean of  $t_{ik}$  converges to  $\sqrt{\frac{1}{2}} \cdot t_i^*$ , up to an  $O(N^{-1})$  difference.

**Lemma 1.10.** *The conditional median of  $t_{ik}$  is*

$$\text{Med}(t_{ik}|\epsilon_i) = \frac{\bar{x}_i^A - \bar{x}_i^B - d_k}{\sqrt{\sigma_k^2 + \hat{\sigma}_{\epsilon,i}^2} \cdot \sqrt{\frac{1}{N_A} + \frac{1}{N_B}}} + O(N^{-1}). \tag{19}$$

In particular, for  $k \in \mathcal{S}^0$ ,

$$\text{Med}(t_{ik}|\epsilon_i) = \sqrt{\frac{1}{1 + \frac{(\hat{\sigma}_{\epsilon,i}^p)^2}{\sigma_k^2}}} \cdot t_i^* + O(N^{-1}). \tag{20}$$

For  $k \in \mathcal{S}^1$

$$\text{Med}(t_{ik}|\epsilon_i) = O(N). \tag{21}$$

*Proof.* Based on Cornish-Fisher expansion,

$$\text{Med}(t_{ik}|\epsilon_i) = E(t_{ik}|\epsilon_i) + \frac{\text{SK}(t_{ik}) \cdot (E(t_{ik}|\epsilon_i) - 1)}{6\sqrt{N}} + O(N^{-1}). \quad (22)$$

However, the skewness of  $t_{ik}$  is of order  $N^{-1}$ . so

$$\text{Med}(t_{ik}|\epsilon_i) = E(t_{ik}|\epsilon_i) + O(N^{-1}) = \frac{\bar{x}_i^A - \bar{x}_i^B - d_k}{\sqrt{\sigma_k^2 + \hat{\sigma}_{\epsilon,i}^2} \cdot \sqrt{\frac{1}{N_A} + \frac{1}{N_B}}} + O(N^{-1}).$$

□

Putting all the above conclusions together, we have the following theorem.

**Theorem 1.11.** *Assume that  $\sigma_k^2 \equiv \sigma^2$  for all  $k$  (interchangeable covariance structure). The conditional mean and median of  $t_{ik}$ , have the following asymptotic representation.*

For  $k \in \mathcal{S}^0$ ,

$$\begin{aligned} E(t_{ik}|\epsilon_i) &\xrightarrow{\mathcal{P}_{\epsilon_i}} \sqrt{\frac{1}{2}} \cdot t_i^* + O(N^{-1}), \\ \text{Med}(t_{ik}|\epsilon_i) &\xrightarrow{\mathcal{P}_{\epsilon_i}} \sqrt{\frac{1}{2}} \cdot t_i^* + O(N^{-1}). \end{aligned} \quad (23)$$

For  $k \in \mathcal{S}^1$ , both the mean and median approaches infinity with rate  $O(N)$ :

$$\begin{aligned} E(t_{ik}|\epsilon_i) &\xrightarrow{\mathcal{P}_{\epsilon_i}} \text{Sgn}(d_k) \cdot \infty, \\ \text{Med}(t_{ik}|\epsilon_i) &\xrightarrow{\mathcal{P}_{\epsilon_i}} \text{Sgn}(d_k) \cdot \infty. \end{aligned} \quad (24)$$

Here  $\text{Sgn}(d_k)$  is the sign of  $d_k$  and  $\mathcal{P}_{\epsilon_i}$  stands for the probability law of  $\epsilon_i$ .

*Proof.* We only need to use the strong law of large number (**SLLN**) of  $\mathcal{P}_{\epsilon_i}$ ,

$$\hat{\sigma}_{\epsilon,i}^2 \xrightarrow{\mathcal{P}_{\epsilon_i}} \sigma^2.$$

Therefore

$$\sqrt{\frac{1}{1 + \frac{(\hat{\sigma}_{\epsilon,i}^2)^2}{\sigma_k^2}}} \xrightarrow{\mathcal{P}_{\epsilon_i}} \sqrt{\frac{1}{2}}.$$

The divergence result for  $k \in \mathcal{S}^1$  follows from the fact that  $\frac{d_k}{\sqrt{\sigma_k^2 + \hat{\sigma}_{\epsilon,i}^2} \cdot \sqrt{\frac{1}{N_A} + \frac{1}{N_B}}}$  is the dominating term if  $d_k \neq 0$ . □

*Remark.* Equations (23) justifies the use of multiplicative coefficient  $\sqrt{2}$  in **super-delta** method when estimating the oracle  $t$ -statistic. The asymptotic behavior of the “ $\mathcal{S}^0$ -pairing” means that when  $N \rightarrow \infty$ , the bulk of the empirical distribution of  $\vec{t}_i$  converges to a (constant times) noncentral Student  $t$ -distribution, centered at the oracle  $t$ -statistic. On the other hand, the “ $\mathcal{S}^1$ -pairing”, which constitutes two smaller proportions (one for up- and one for down-regulated genes) of the empirical distribution of  $\vec{t}_i$ , will “move away” from that bulk distribution.

This phenomenon is illustrated in Figure 1.



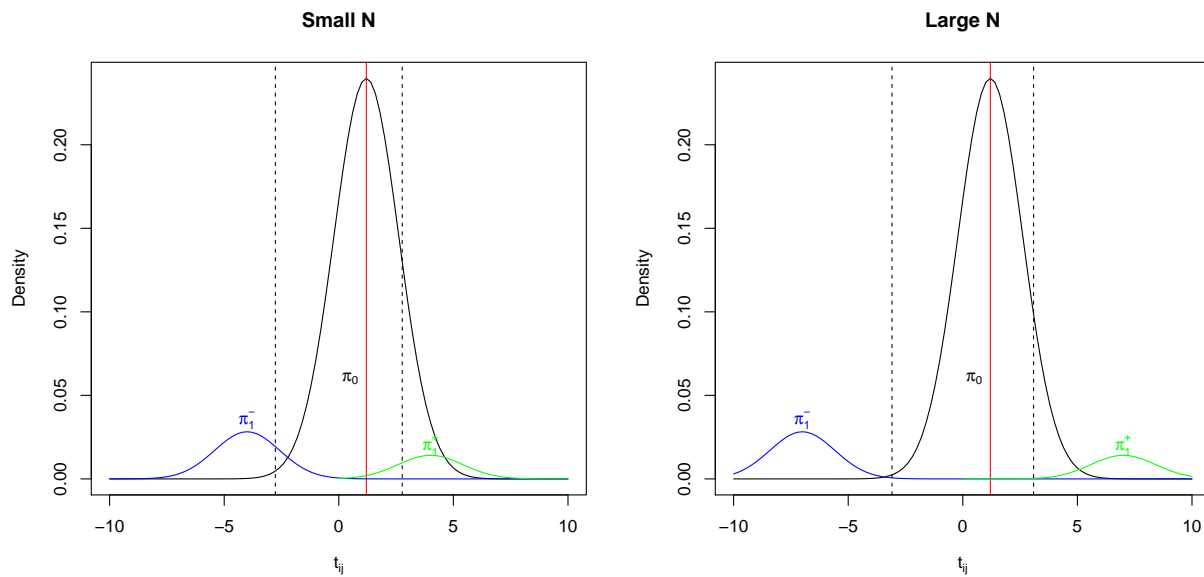

Figure 1: An illustration of different asymptotic behavior of  $t_{ik}$ . The large central density represents those  $t_{ik}$  paired with NDEGs ( $k \in \mathcal{S}^0$ ). Two smaller densities represents  $t_{ik}$  calculated from pairing with up- and down-regulated genes. The proportions are:  $\pi_0 = 0.85$  for true NDEGs;  $\pi_1^+ = 0.05$  for down-regulated genes;  $\pi_1^- = 0.10$  for up-regulated genes. Oracle  $t^*$  is set to be 1.7 (represented by the red vertical line). When the up- and down-regulation effect sizes are fixed and  $N$  becomes larger, the centers for the two smaller densities of  $t_{ik}$  converges to  $-\infty$  and  $+\infty$ , respectively. Consequently, a 20% median fold trim (represented by the two dotted vertical lines) can effectively remove the two smaller clusters of  $t_{ik}$ .

## References

- [1] Tsodikov, A., Szabo, A., Jones, D.: Adjustments and measures of differential expression for microarray data. *Bioinformatics* **18**(2), 251–260 (2002)
- [2] Ni, T.T., Lemon, W.J., Shyr, Y., Zhong, T.P.: Use of normalization methods for analysis of microarrays containing a high degree of gene effects. *BMC Bioinformatics* **9**, 505 (2008). doi:10.1186/1471-2105-9-505
- [3] Qin, L.-X., Satagopan, J.M.: Normalization method for transcriptional studies of heterogeneous samples—simultaneous array normalization and identification of equivalent expression. *Stat Appl Genet Mol Biol* **8**(1), 10 (2009). doi:10.2202/1544-6115.1339
- [4] Ogunnaike, B.A., Gelmi, C.A., Edwards, J.S.: A probabilistic framework for microarray data analysis: fundamental probability models and statistical inference. *J Theor Biol* **264**(2), 211–222 (2010). doi:10.1016/j.jtbi.2010.02.021
- [5] Qiu, X., Hu, R., Wu, Z.: Evaluation of bias-variance trade-off for commonly used post-summarizing normalization procedures in large-scale gene expression studies. *PloS one* **9**(6), 99380 (2014)
- [6] Qiu, X., Wu, H., Hu, R.: The impact of quantile and rank normalization procedures on the testing power of gene differential expression analysis. *BMC bioinformatics* **14**(1), 124 (2013)
